# Supplementary material
Source: PubMed Central journal article supplement (PMC6514296)
Supplement: BPH-176-1764-s001.pdf [file BPH-176-1764-s001.pdf]

**Small molecule-facilitated anion transporters for a novel cystic fibrosis substitutive therapy**

**SUPPLEMENTARY DATA**

**Michele Fiore<sup>1</sup>, Claudia Cossu<sup>1</sup>, Valeria Capurro<sup>2</sup>, Cristiana Picco<sup>1</sup>, Alessandra Ludovico<sup>1</sup>,  
Marcin Mielczarek<sup>3</sup>, Israel Carreira-Barral<sup>3</sup>, Emanuela Caci<sup>2</sup>, Debora Baroni<sup>1</sup>,  
Roberto Quesada<sup>3</sup>, Oscar Moran<sup>1\*</sup>**

<sup>1</sup>Istituto di Biofisica, CNR, Genova, Italy;

<sup>2</sup>U.O.C. Genetica Medica, Istituto Giannina Gaslini, Genova, Italy

<sup>3</sup>Departamento de Química, Facultad de Ciencias, Universidad de Burgos, Burgos, Spain

## Table of Contents

|                                                                                                          |    |
|----------------------------------------------------------------------------------------------------------|----|
| Figure S1. Structures of the studied compounds.....                                                      | 3  |
| Synthesis and characterisation of compound MM3.....                                                      | 4  |
| Figure S2. <sup>1</sup> H NMR spectrum (300 MHz, CDCl <sub>3</sub> ) for compound MM3.....               | 5  |
| Figure S3. <sup>13</sup> C NMR spectrum (75 MHz, CDCl <sub>3</sub> ) for compound MM3.....               | 6  |
| Figure S4. <sup>13</sup> C NMR dept135 spectrum (75 MHz, CDCl <sub>3</sub> ) for compound MM3.....       | 7  |
| Figure S5. HR-MS (ESI+) spectra for compound MM3.....                                                    | 8  |
| X-RAY DIFFRACTION STUDIES.....                                                                           | 9  |
| Figure S6. X-ray structure of compound MM3.....                                                          | 9  |
| Table 1. Crystal data and refinement details for MM3.....                                                | 9  |
| Anion exchange experiments (Cl <sup>-</sup> /NO <sub>3</sub> <sup>-</sup> ) in unilamellar vesicles..... | 10 |
| Figure S7. A: Chloride efflux promoted by EH130.....                                                     | 10 |
| Figure S8. A: Chloride efflux promoted by MM3.....                                                       | 10 |
| Figure S9. A: Chloride efflux promoted by Obatoclox.....                                                 | 11 |
| Figure S10. A: Chloride efflux promoted by Prodigiosin at different concentrations.....                  | 11 |
| Figure S11. A: Chloride efflux promoted by RQ363.....                                                    | 12 |
| Experiments in cells.....                                                                                | 13 |
| Figure S12. Chloride efflux measured in CHO cells.....                                                   | 13 |
| Figure S13. Iodide influx assay in FRT cells.....                                                        | 14 |
| Figure S14. Effects of pH on anionophores activity.....                                                  | 15 |
| Figure S15. Effects of anion competition in iodide transport.....                                        | 16 |
| Figure S16. Anionophore-driven iodide transport in cells transfected with WT CFTR.....                   | 17 |
| Figure S17. Anionophore-driven iodide transport in cells transfected with G551D CFTR.....                | 18 |
| Figure S18. Anionophore-driven iodide transport in cells transfected with F508del CFTR.....              | 19 |
| REFERENCES.....                                                                                          | 21 |

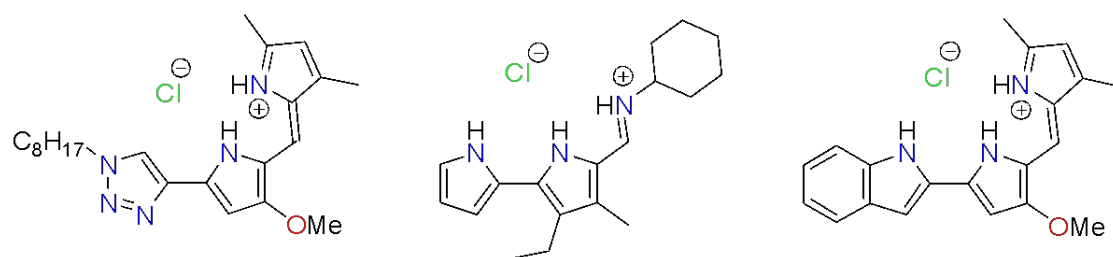

**EH130**

**MM3**

**Obatoclax**

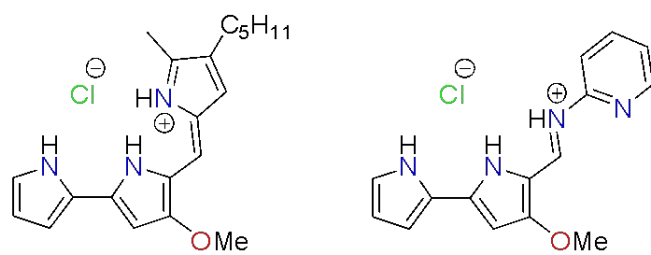

**Prodigiosin**

**RQ363**

**Figure S1.** Structures of the studied compounds.

### Synthesis and characterisation of compound MM3

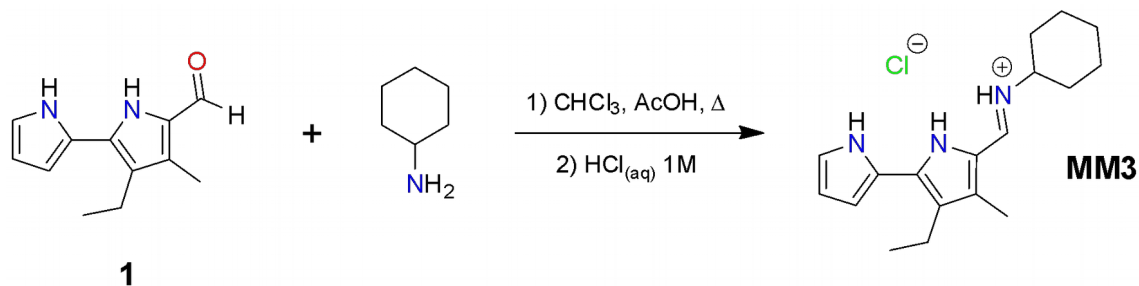

Aldehyde **1** was prepared according to the literature (Kancharla and Reynolds 2013). To a solution of such aldehyde (250.9 mg, 1.24 mmol) in chloroform (10 ml) glacial acetic acid (50  $\mu\text{l}$ ) and cyclohexylamine (275  $\mu\text{l}$ , 2.40 mmol, 1.94 equiv.) were added, and the resulting reaction mixture was stirred at 60  $^\circ\text{C}$  for 6 h. Upon cooling to room temperature the chloroform was evaporated under reduced pressure and the residue was re-dissolved in dichloromethane (30 ml). The solution of the crude compound **MM3** was washed with 1 M aqueous HCl solution ( $3 \times 20$  ml), dried over anhydrous  $\text{Na}_2\text{SO}_4$ , filtered and evaporated to dryness under reduced pressure. The residue was recrystallised from a mixture of dichloromethane and *n*-hexane to give compound **MM3** as dark green needles (264.2 mg, 67%).  $^1\text{H}$  NMR (300 MHz,  $\text{CDCl}_3$ ):  $\delta$  (ppm) = 13.59 (s, 1H), 10.83 (s, 1H), 10.30 (d, 1H,  $J = 15$  Hz), 7.38 (d, 1H,  $J = 15$  Hz), 7.12-7.08 (m, 1H), 6.81-6.76 (m, 1H), 6.34-6.28 (m, 1H), 3.52-3.36 (m, 1H), 2.66 (q, 2H,  $J = 7.5$  Hz), 2.19 (s, 3H), 2.13-2.03 (m, 2H), 1.97-1.84 (m, 2H), 1.76-1.60 (m, 2H), 1.43-1.22 (m, 4H), 1.15 (t, 3H,  $J = 7.5$  Hz).  $^{13}\text{C}$  NMR (75 MHz,  $\text{CDCl}_3$ ):  $\delta$  (ppm) = 141.6 (CH), 139.1 (ArC), 139.0 (ArC), 126.4 (ArC), 122.6 (ArCH), 122.3 (ArC), 119.6 (ArC), 112.1 (ArCH), 110.4 (ArCH), 60.0 (CH), 33.0 ( $\text{CH}_2$ ), 24.4 ( $\text{CH}_2$ ), 24.2 ( $\text{CH}_2$ ), 17.7 ( $\text{CH}_2$ ), 13.4 ( $\text{CH}_3$ ), 9.0 ( $\text{CH}_3$ ). HR-MS (ESI $^+$ ): found  $m/z$  (Da) = 284.2121 [ $\text{C}_{18}\text{H}_{26}\text{N}_3$ ] $^+$ ; calculated  $m/z$  (Da) = 284.2121.

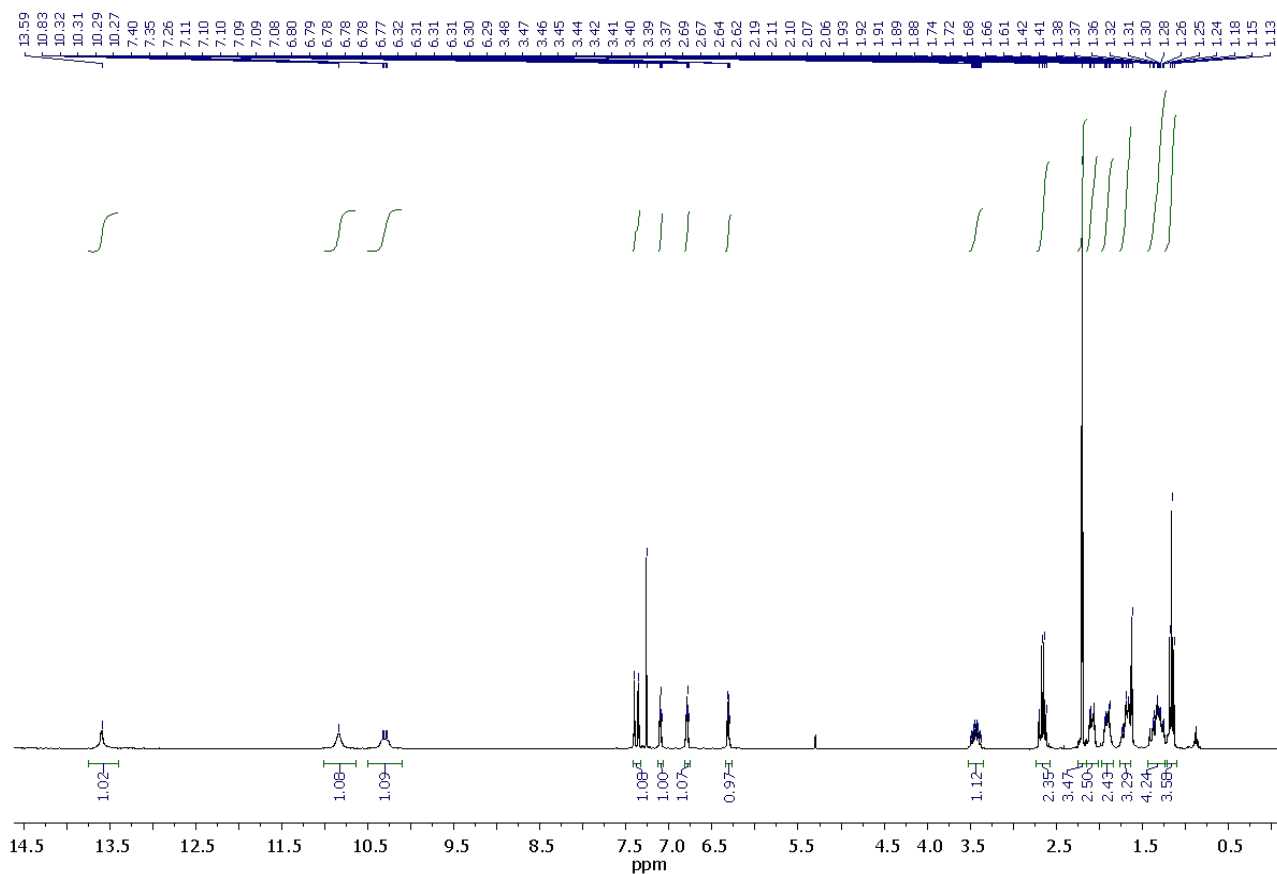

**Figure S2.**  $^1\text{H}$  NMR spectrum (300 MHz,  $\text{CDCl}_3$ ) for compound **MM3**.

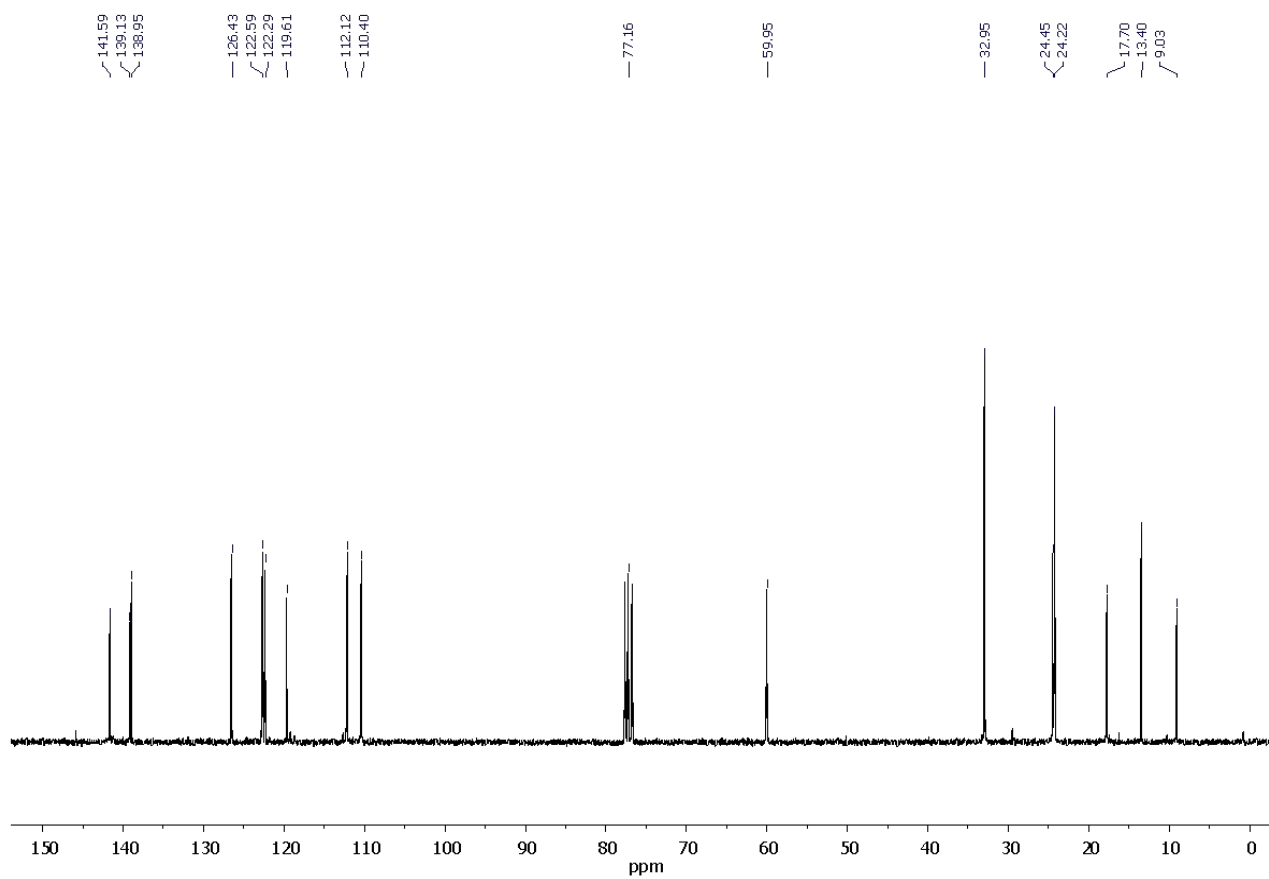

**Figure S3.**  $^{13}\text{C}$  NMR spectrum (75 MHz,  $\text{CDCl}_3$ ) for compound **MM3**.

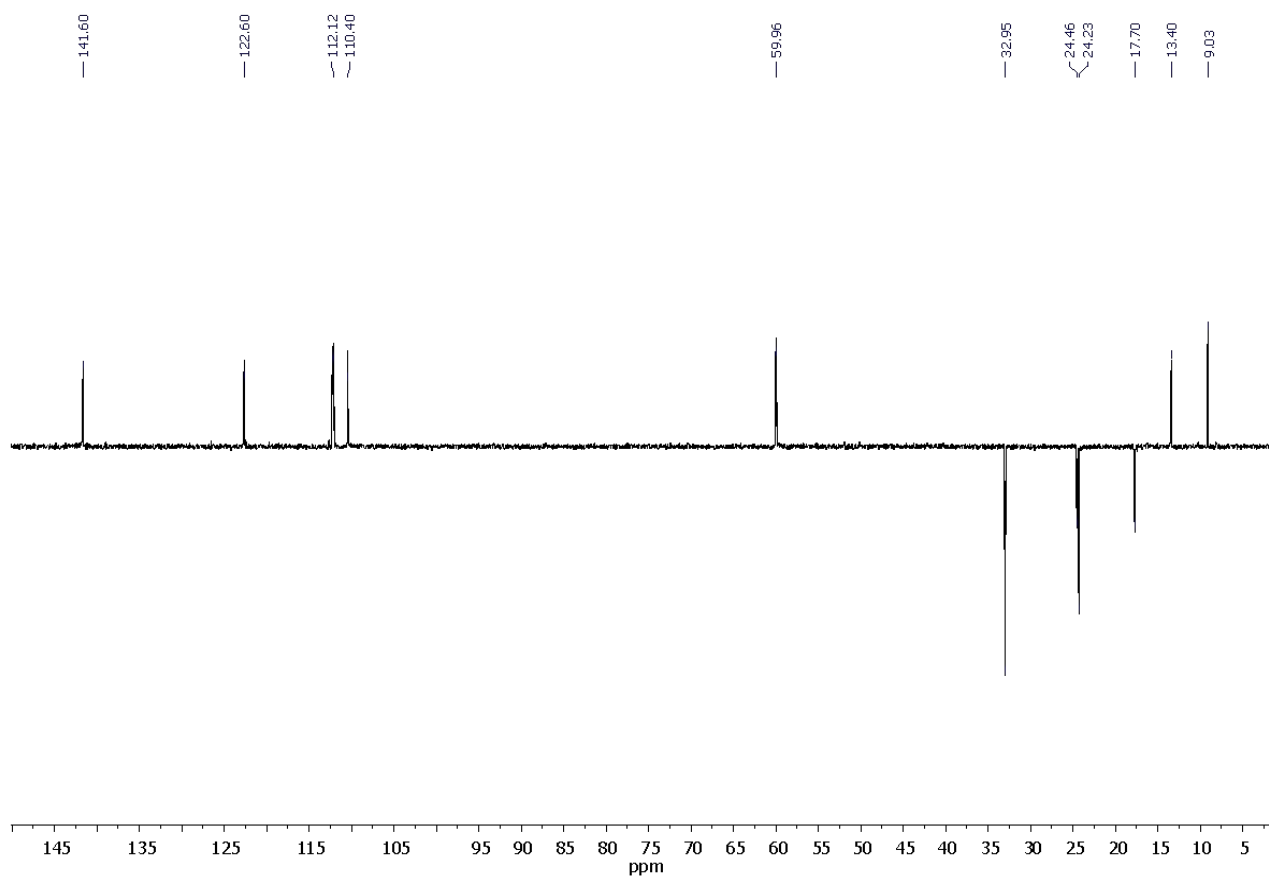

**Figure S4.**  $^{13}\text{C}$  NMR dept135 spectrum (75 MHz,  $\text{CDCl}_3$ ) for compound **MM3**.

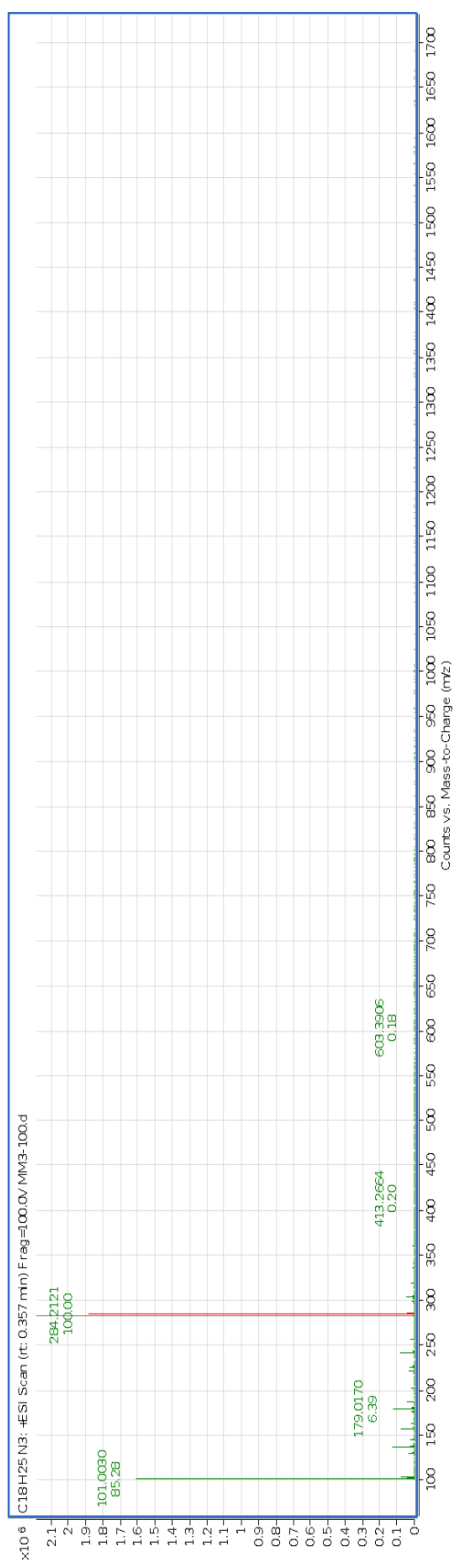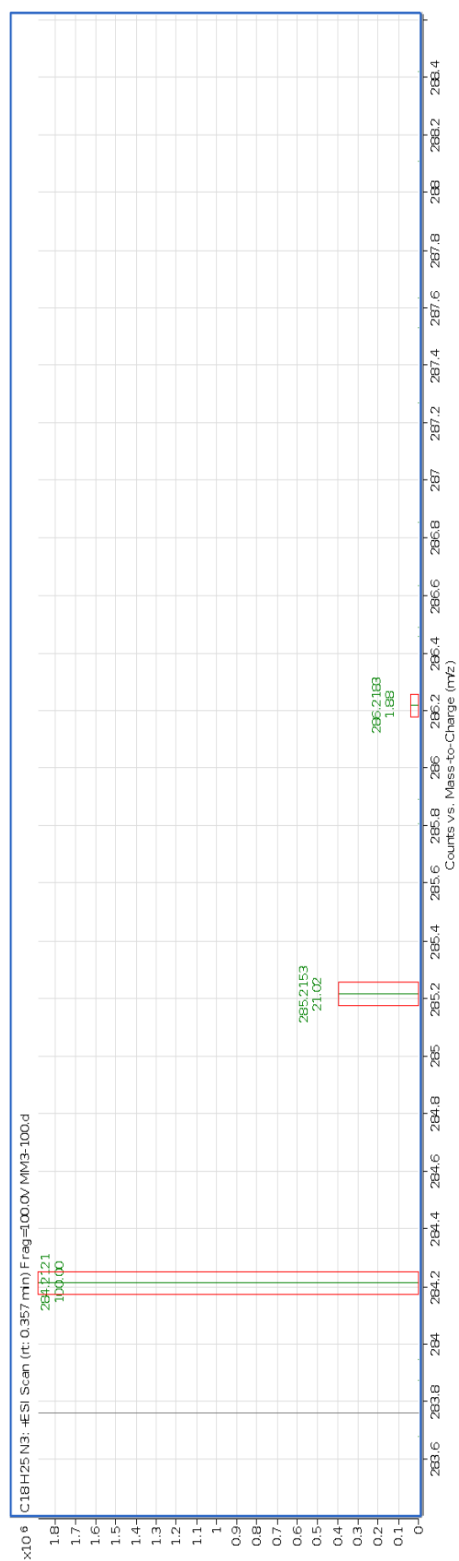

**Figure S5.** HR-MS (ESI<sup>+</sup>) spectra for compound **MM3**.



## X-RAY DIFFRACTION STUDIES

### Solid state structure of compound MM3

Single crystals were obtained by slow evaporation of a solution of the isolated compound in a 1:1 dichloromethane-methanol mixture.

Three dimensional X-ray data were collected on a BRUKER SMART APEX CCD diffractometer. Complex scattering factors were taken from the program SHELX-97 (Hübschle et al. 2011) running under the WinGX program system (Farrugia 1999) as implemented on a Pentium computer. The structure was solved with SIR97 (Altomare et al. 1999) and refined by full-matrix least-squares on  $F^2$ . All hydrogen atoms, except those corresponding to the NH fragments of the imine function and the pyrrole and indole rings, which were refined freely, were included in calculated positions and refined in riding mode. Refinement converged with anisotropic displacement parameters for all non-hydrogen atoms. Crystal data and details on data collection and refinement are summarised in Table 1.

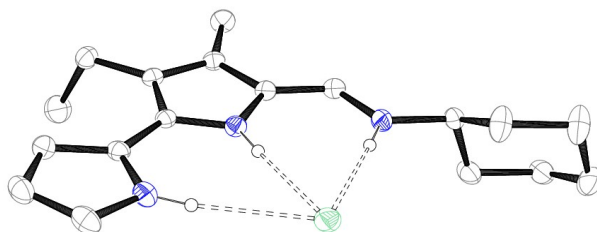

**Figure S6.** X-ray structure of compound **MM3**. Hydrogen atoms, except those involved in hydrogen-bonding interactions, are omitted for the sake of simplicity. The ORTEP plot is at the 30% probability level.

**Table 1.** Crystal data and refinement details for **MM3**.

|                     |                     |                                              |                  |
|---------------------|---------------------|----------------------------------------------|------------------|
| formula             | $C_{16}H_{12}ClN_2$ | $Z$                                          | 18               |
| MW                  | 319.87              | $\lambda$ , Å (MoK $\alpha$ )                | 0.71073          |
| crystal system      | Trigonal            | $D_{calc}/g\text{ cm}^{-3}$                  | 1.128            |
| space group         | R -3                | $\mu/mm^{-1}$                                | 0.204            |
| $T/K$               | 100(2)              | $\theta$ range/deg                           | 1.38 – 28.26     |
| $a/\text{Å}$        | 29.4497(19)         | $R_{int}$                                    | 0.1326           |
| $b/\text{Å}$        | 29.4497(19)         | reflections measured                         | 32843            |
| $c/\text{Å}$        | 11.2815(15)         | unique reflections                           | 4455             |
| $\alpha/\text{deg}$ | 90                  | reflections observed                         | 2773             |
| $\beta/\text{deg}$  | 90                  | GOF on $F^2$                                 | 0.988            |
| $\gamma/\text{deg}$ | 120                 | $R1^a$                                       | 0.0576           |
| $V/\text{Å}^3$      | 8473.4(16)          | $wR2^b$                                      | 0.1439           |
| $F(000)$            | 3096                | Largest $\neq$ peak & hole/ $e\text{Å}^{-3}$ | 0.506 and -0.399 |

$$^a R1 = \frac{\sum |F_o - F_c|}{\sum |F_o|} ; \quad ^b wR2 = \left[ \frac{\sum [w(F_o^2 - F_c^2)^2]}{\sum [wF_o^4]} \right]^{1/2}$$

## Anion exchange experiments ( $\text{Cl}^-/\text{NO}_3^-$ ) in unilamellar vesicles

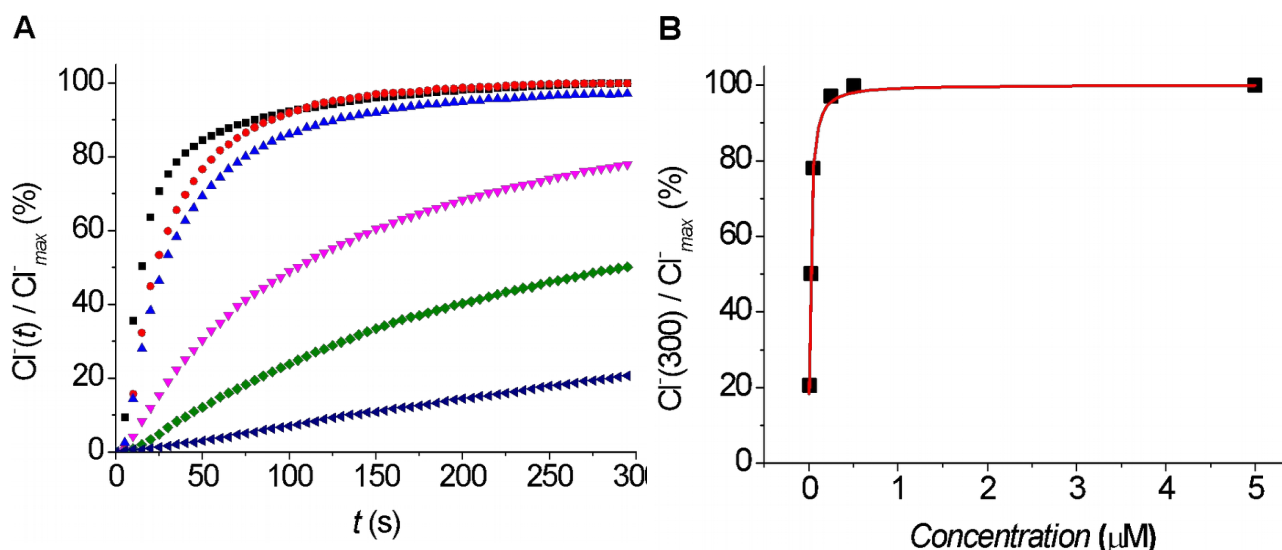

**Figure S7. A:** Chloride efflux promoted by EH130 at different concentrations (5  $\mu\text{M}$ , black; 0.5  $\mu\text{M}$ , red; 0.25  $\mu\text{M}$ , light blue; 0.05  $\mu\text{M}$ , magenta; 0.02  $\mu\text{M}$ , green; 0.005  $\mu\text{M}$ , dark blue) in LUV. Vesicles loaded with 489 mM NaCl were buffered at pH 7.2 with 5 mM phosphate and dispersed in 489 mM  $\text{NaNO}_3$  buffered at pH 7.2. Each trace represents the average of three independent measurements. **B:** The normalised chloride efflux at 300 s plotted against the anionophore concentration. The dose-response curve was constructed from 144 independent measurements. Data have been plotted with Hill equation (continuous line), yielding an  $\text{ED}_{50}$  of 0.018  $\mu\text{M}$ .

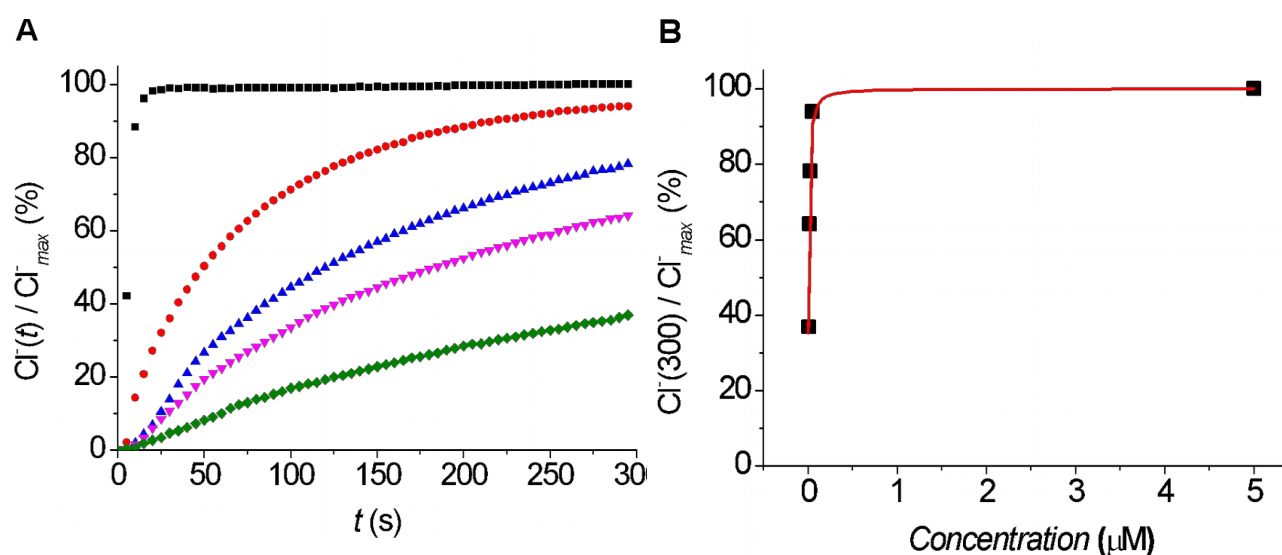

**Figure S8. A:** Chloride efflux promoted by MM3 at different concentrations (5  $\mu\text{M}$ , black; 0.05  $\mu\text{M}$ , red; 0.025  $\mu\text{M}$ , blue; 0.015  $\mu\text{M}$ , magenta; 0.005  $\mu\text{M}$ , green) in LUV. Vesicles loaded with 489 mM NaCl were buffered at pH 7.2 with 5 mM phosphate and dispersed in 489 mM  $\text{NaNO}_3$  buffered at pH 7.2. Each trace represents the average of three independent measurements. **B:** The normalised chloride efflux at 300 s plotted against the anionophore concentration. The dose-response curve was constructed from 15 independent measurements. Data have been plotted with Hill equation (continuous line), yielding an  $\text{ED}_{50}$  of 0.0083  $\mu\text{M}$ .

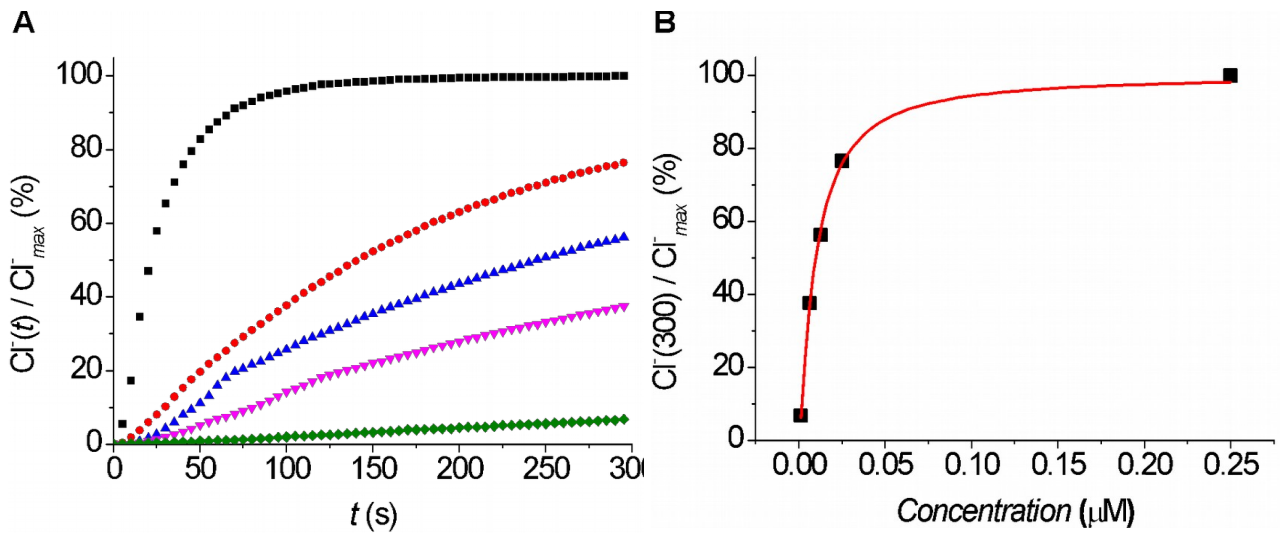

**Figure S9. A:** Chloride efflux promoted by Obatoclax at different concentrations (0.25  $\mu\text{M}$ , black; 0.025  $\mu\text{M}$ , red; 0.0125  $\mu\text{M}$ , blue; 0.00625  $\mu\text{M}$ , magenta; 0.001  $\mu\text{M}$ , green) in LUV. Vesicles loaded with 489 mM NaCl were buffered at pH 7.2 with 5 mM phosphate and dispersed in 489 mM  $\text{NaNO}_3$  buffered at pH 7.2. Each trace represents the average of three independent measurements. **B:** The normalised chloride efflux at 300 s plotted against the anionophore concentration. The dose-response curve was constructed from 90 independent measurements. Data have been plotted with Hill equation (continuous line), yielding an  $\text{ED}_{50}$  of 0.0097  $\mu\text{M}$ .

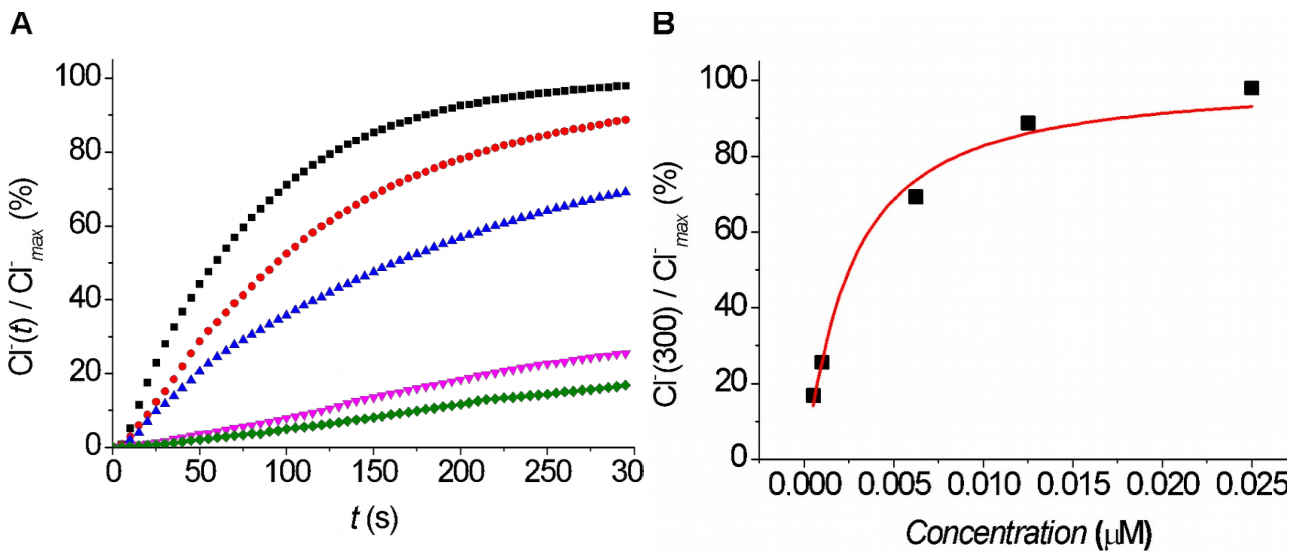

**Figure S10. A:** Chloride efflux promoted by Prodigiosin at different concentrations (0.025  $\mu\text{M}$ , black; 0.0125  $\mu\text{M}$ , red; 0.00625  $\mu\text{M}$ , blue; 0.001  $\mu\text{M}$ , magenta; 0.0005  $\mu\text{M}$ , green) in LUV. Vesicles loaded with 489 mM NaCl were buffered at pH 7.2 with 5 mM phosphate and dispersed in 489 mM  $\text{NaNO}_3$  buffered at pH 7.2. Each trace represents the average of three independent measurements. **B:** The normalised chloride efflux at 300 s plotted against the anionophore concentration. The dose-response curve was constructed from 15 independent measurements. Data have been plotted with Hill equation (continuous line), yielding an  $\text{ED}_{50}$  of 0.0025  $\mu\text{M}$ .

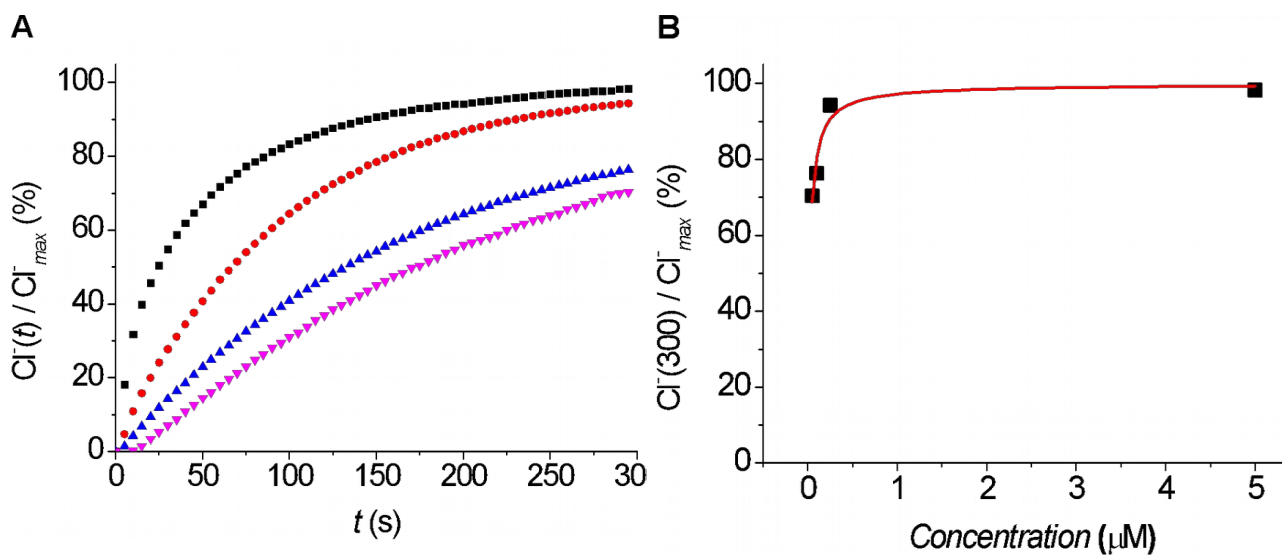

**Figure S11. A:** Chloride efflux promoted by RQ363 at different concentrations (5  $\mu\text{M}$ , black; 0.25  $\mu\text{M}$ , red; 0.1  $\mu\text{M}$ , blue; 0.05  $\mu\text{M}$ , magenta) in LUV. Vesicles loaded with 489 mM NaCl were buffered at pH 7.2 with 5 mM phosphate and dispersed in 489 mM NaNO<sub>3</sub> buffered at pH 7.2. Each trace represents the average of three independent measurements. **B:** The normalised chloride efflux at 300 s plotted against the anionophore concentration. The dose-response curve was constructed from 36 independent measurements. Data have been plotted with Hill equation (continuous line), yielding an ED<sub>50</sub> of 0.021  $\mu\text{M}$ .

## Experiments in cells

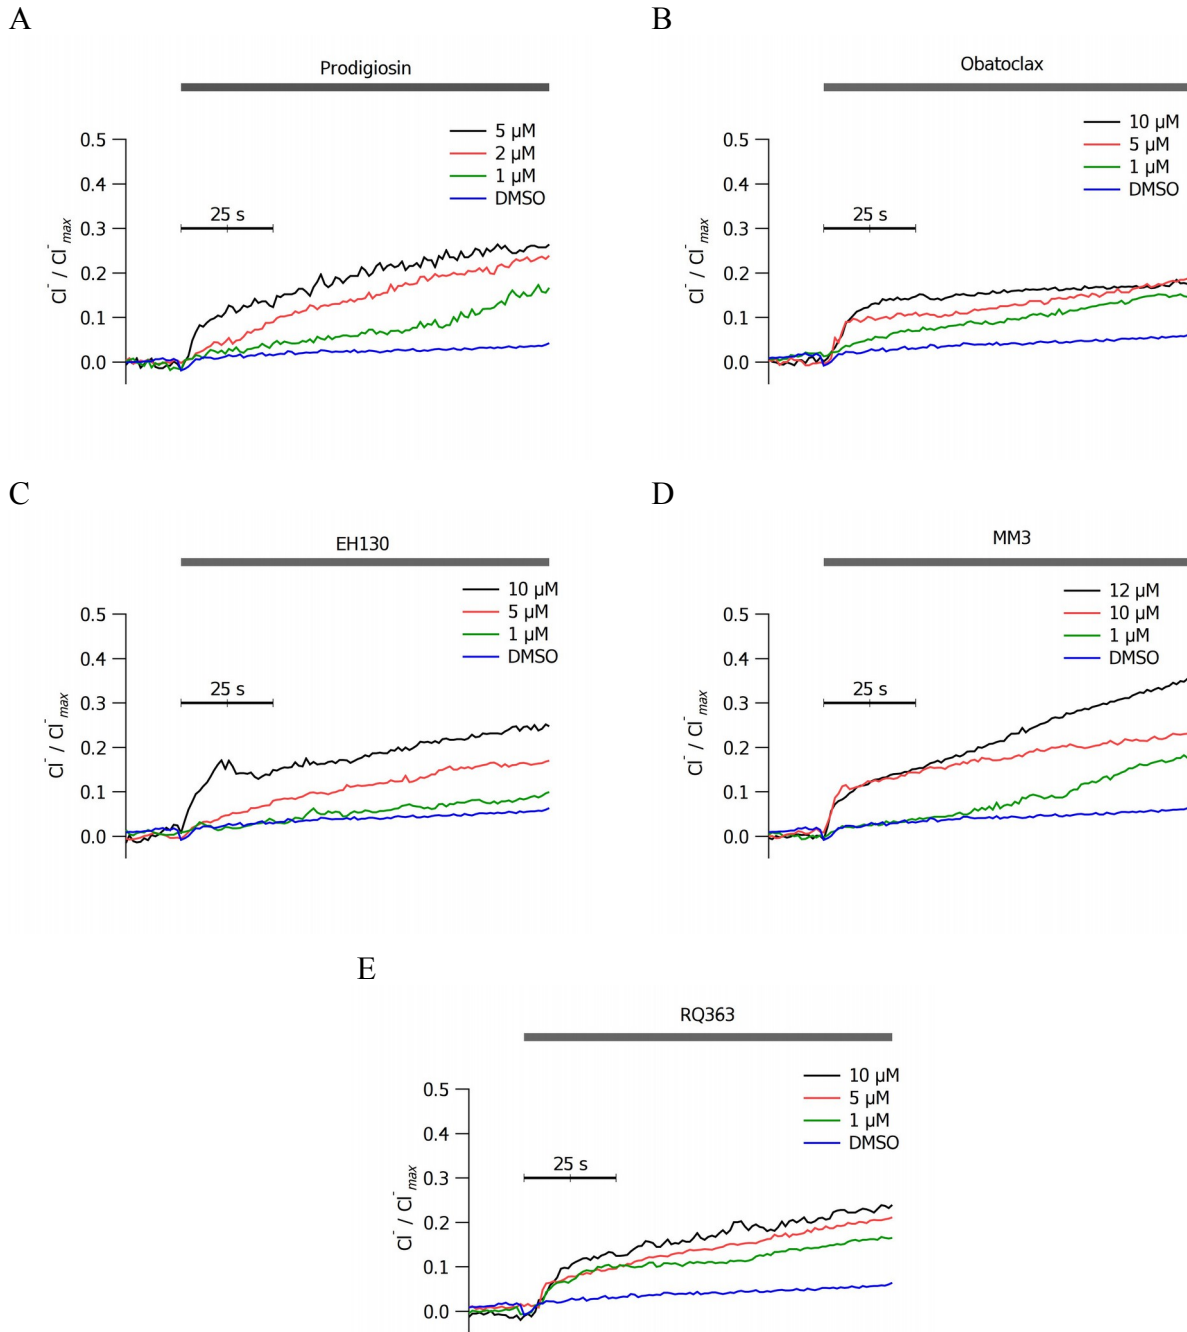

**Figure S12.** Chloride efflux measured in CHO cells upon addition of different concentrations of prodigiosines (A-C) and tambjamines (D-E), as indicated in the figure. The application of the anionophores is indicated by the upper bar.

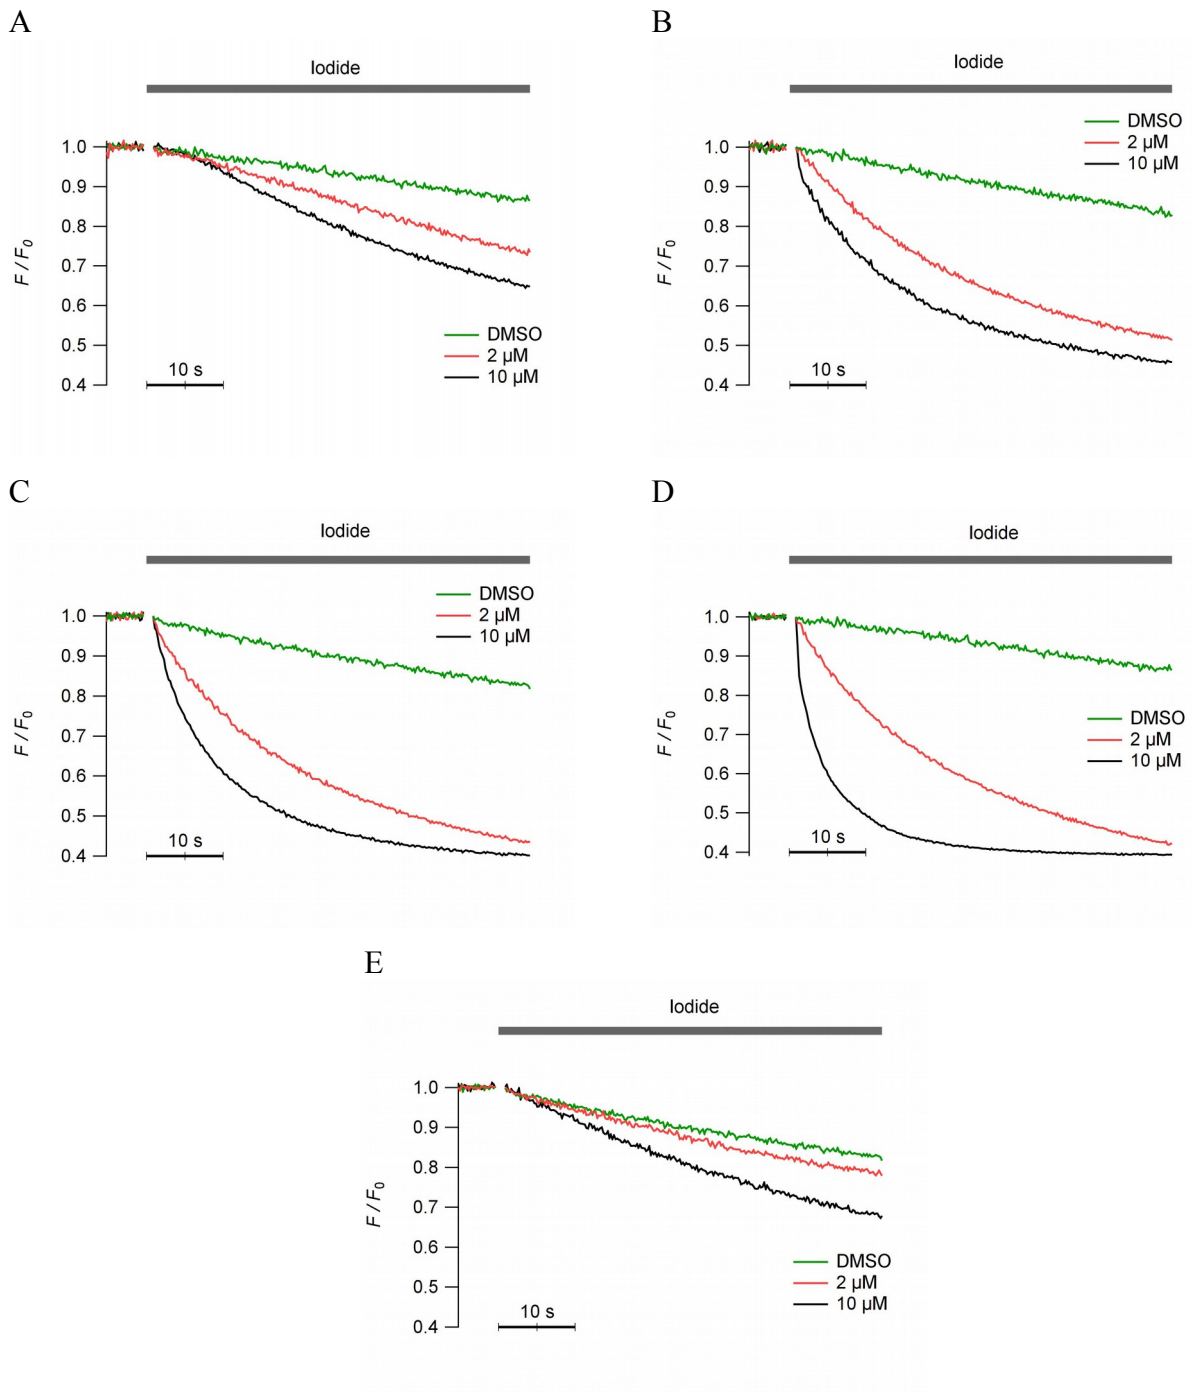

**Figure S13.** Iodide influx assay in FRT cells. Figure indicate the time course of the fluorescence decay in FRT cells incubated at different concentration of EH130 (A), Prodigiosin (B), obatoclax (C), MM3 (D), RQ363 (E). The Iodide injection are indicated by the upper bar.

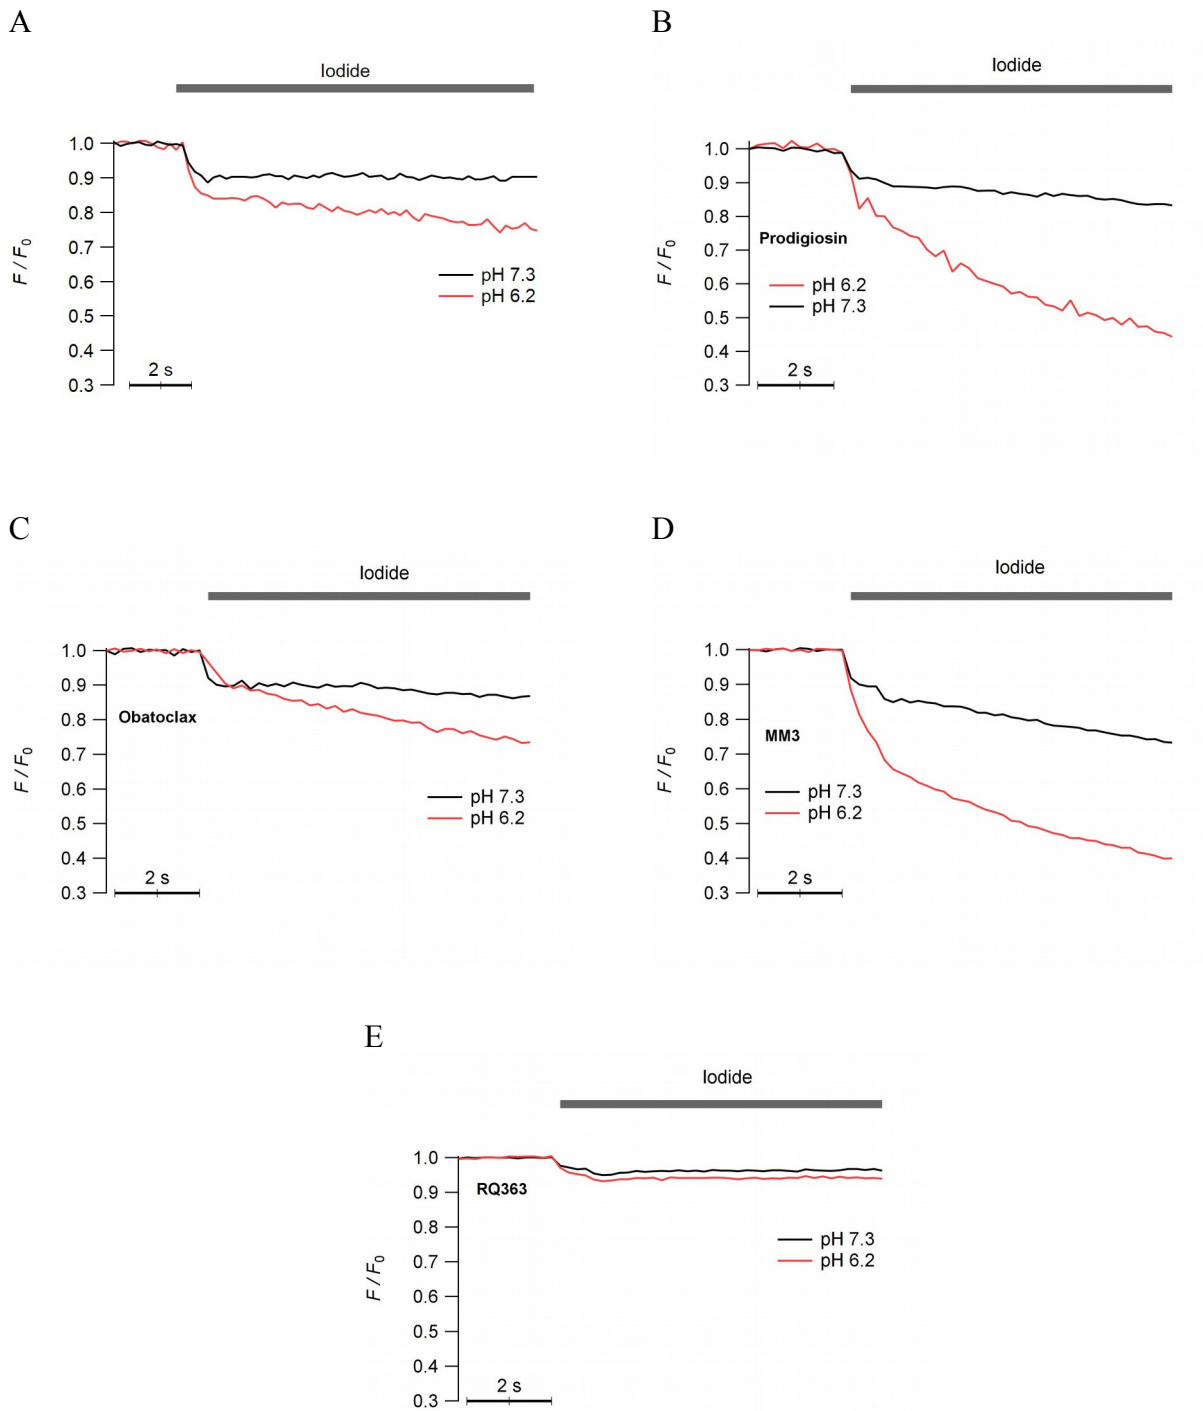

**Figure S14.** Effects of pH on anionophores activity. Figure indicate the time course of the fluorescence decay in FRT cells incubated with 2  $\mu$ M. The Iodide injection are indicated by the upper bar. The traces indicate iodide transport using 2 different pH values of extracellular solution.



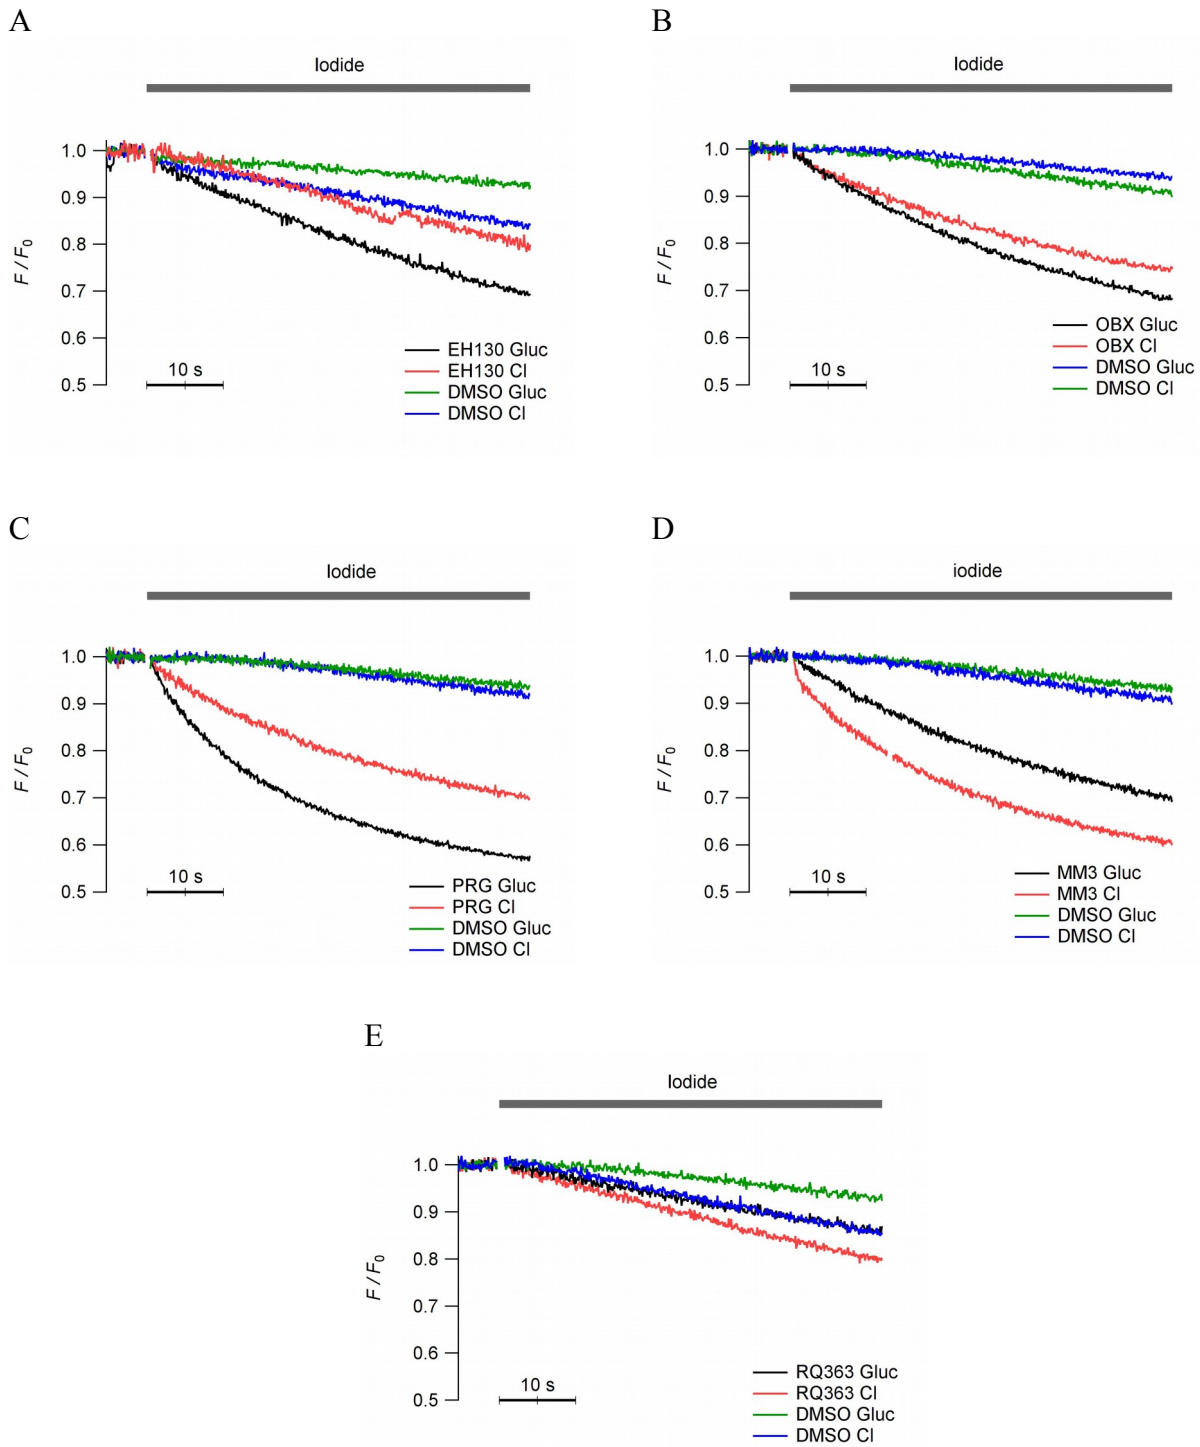

**Figure S15.** Effects of anion competition in iodide transport. Figure indicate the time course of the fluorescence decay in FRT cells incubated with 2  $\mu$ M of anionophores. Iodide transport was measured with different concentrations of chloride and gluconate in the extracellular solution.



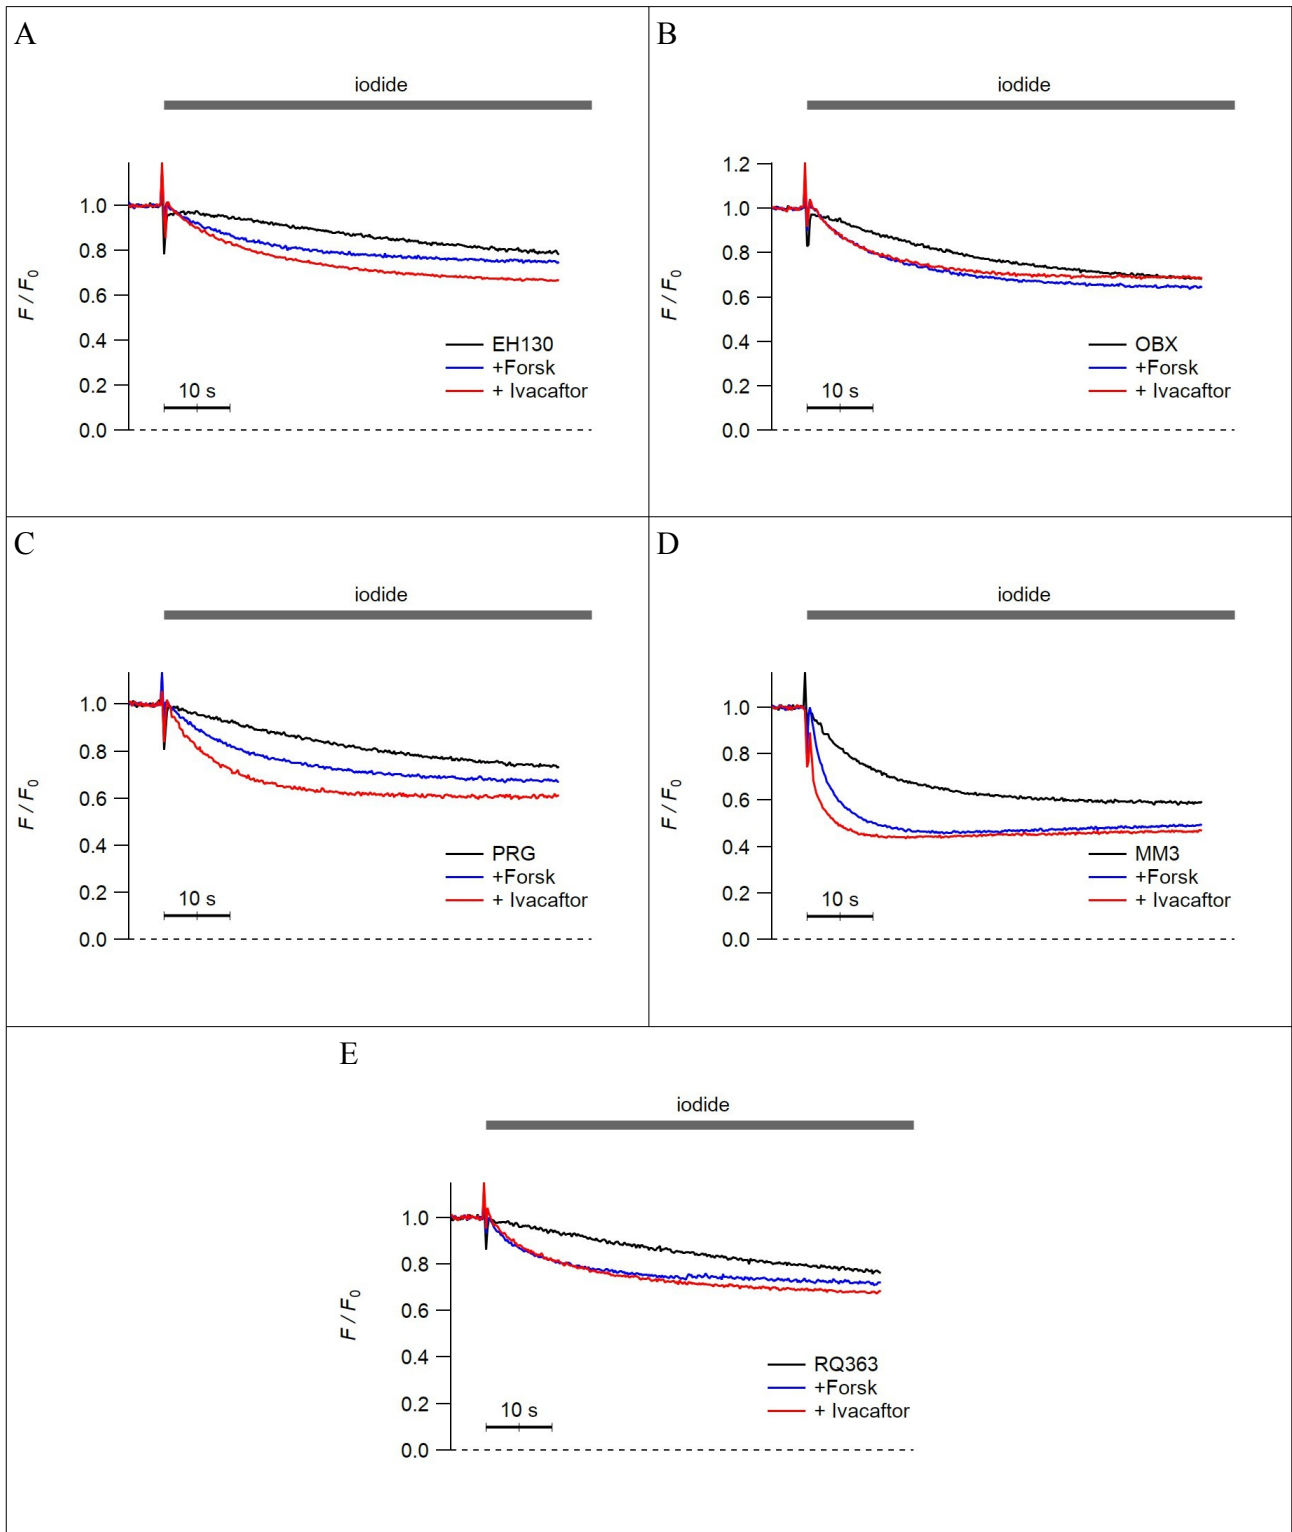

**Figure S16.** Anionophore-driven iodide transport in cells transfected with WT CFTR. Figure indicate the time course of the fluorescence decay in CFTR transfected FRT cells incubated with 2  $\mu\text{M}$  of anionophores. Iodide transport was measured after incubation with anionophore (black trace), anionophore plus forskolin that activates the CFTR (blue trace) and in cells treated with anionophore, forskolin and the CFTR potentiator Ivacaftor (red line).

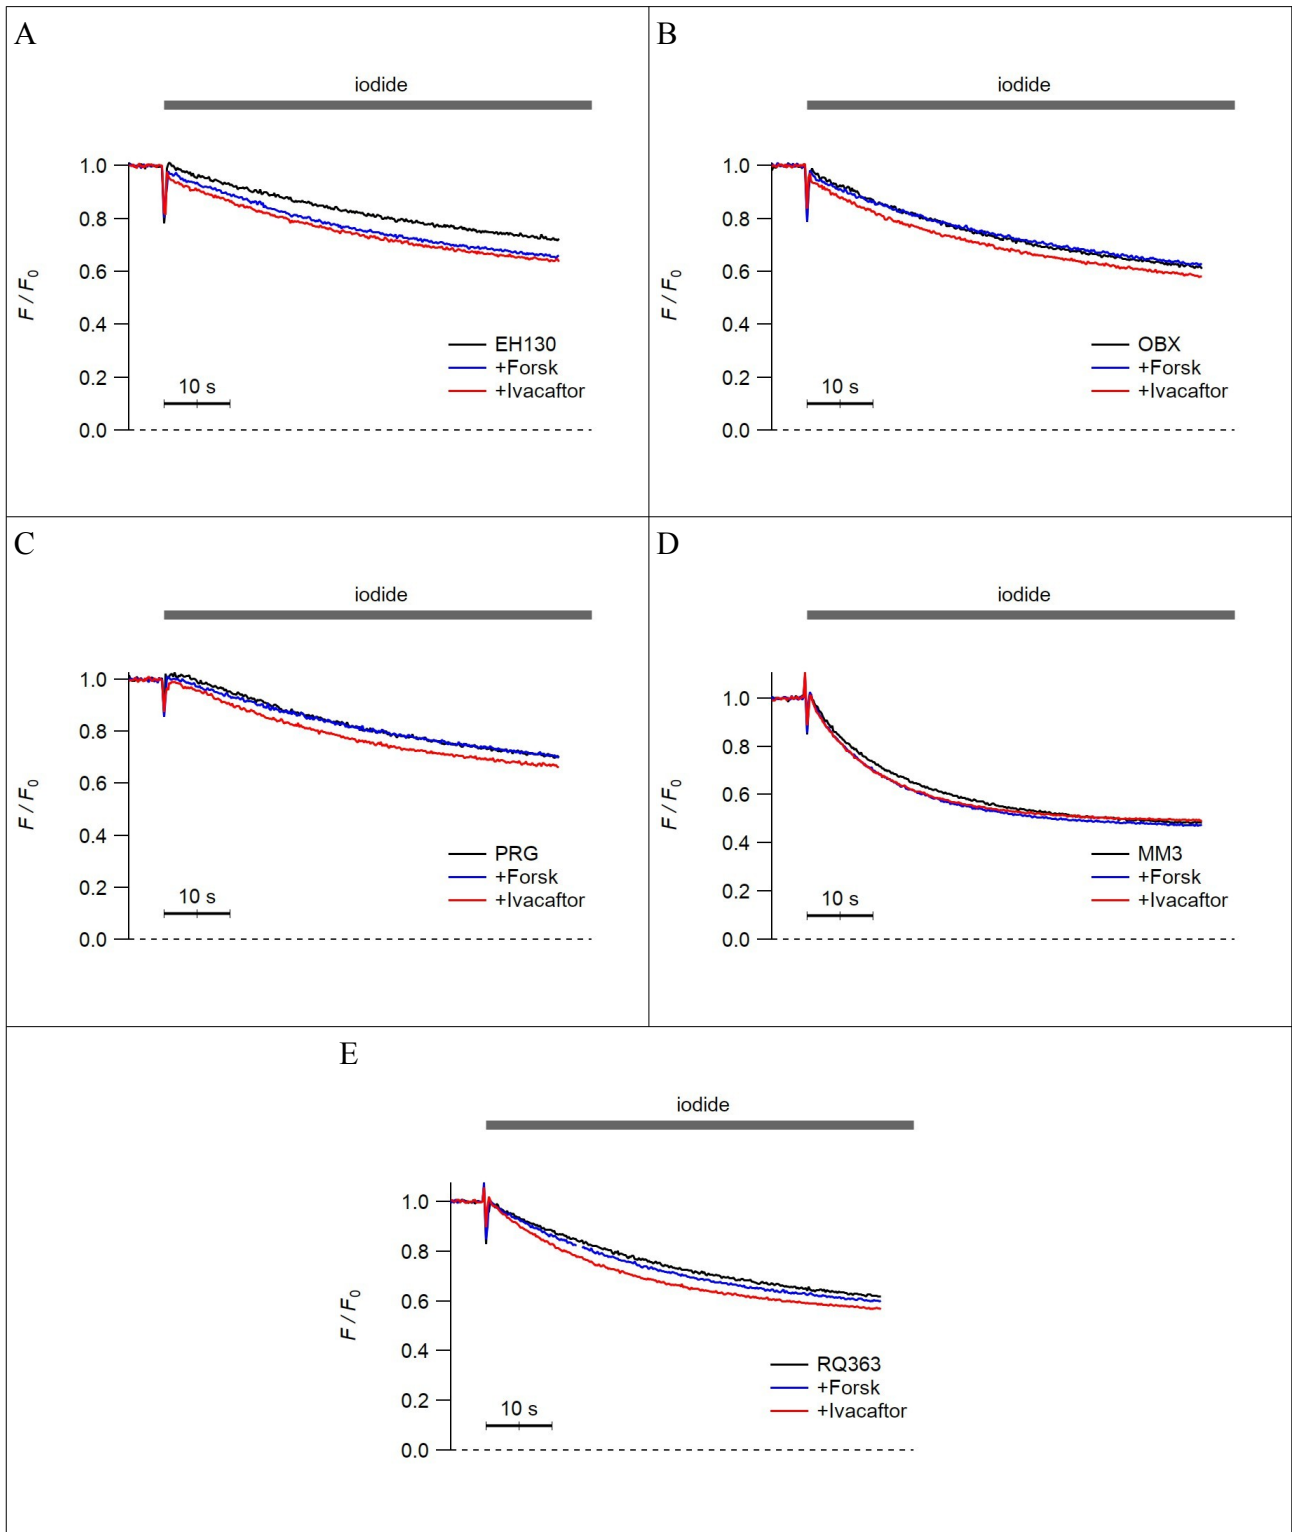

**Figure S17.** Anionophore-driven iodide transport in cells transfected with G551D CFTR. Figure indicate the time course of the fluorescence decay in mutant-CFTR transfected FRT cells incubated with 2  $\mu\text{M}$  of anionophores. Iodide transport was measured after incubation with anionipore (black trace), anionophore plus forskolin that activates the mutant-CFTR (blue trace) and in cells treated with anionophore, forskolin and the CFTR potentiator Ivacaftor (red line).

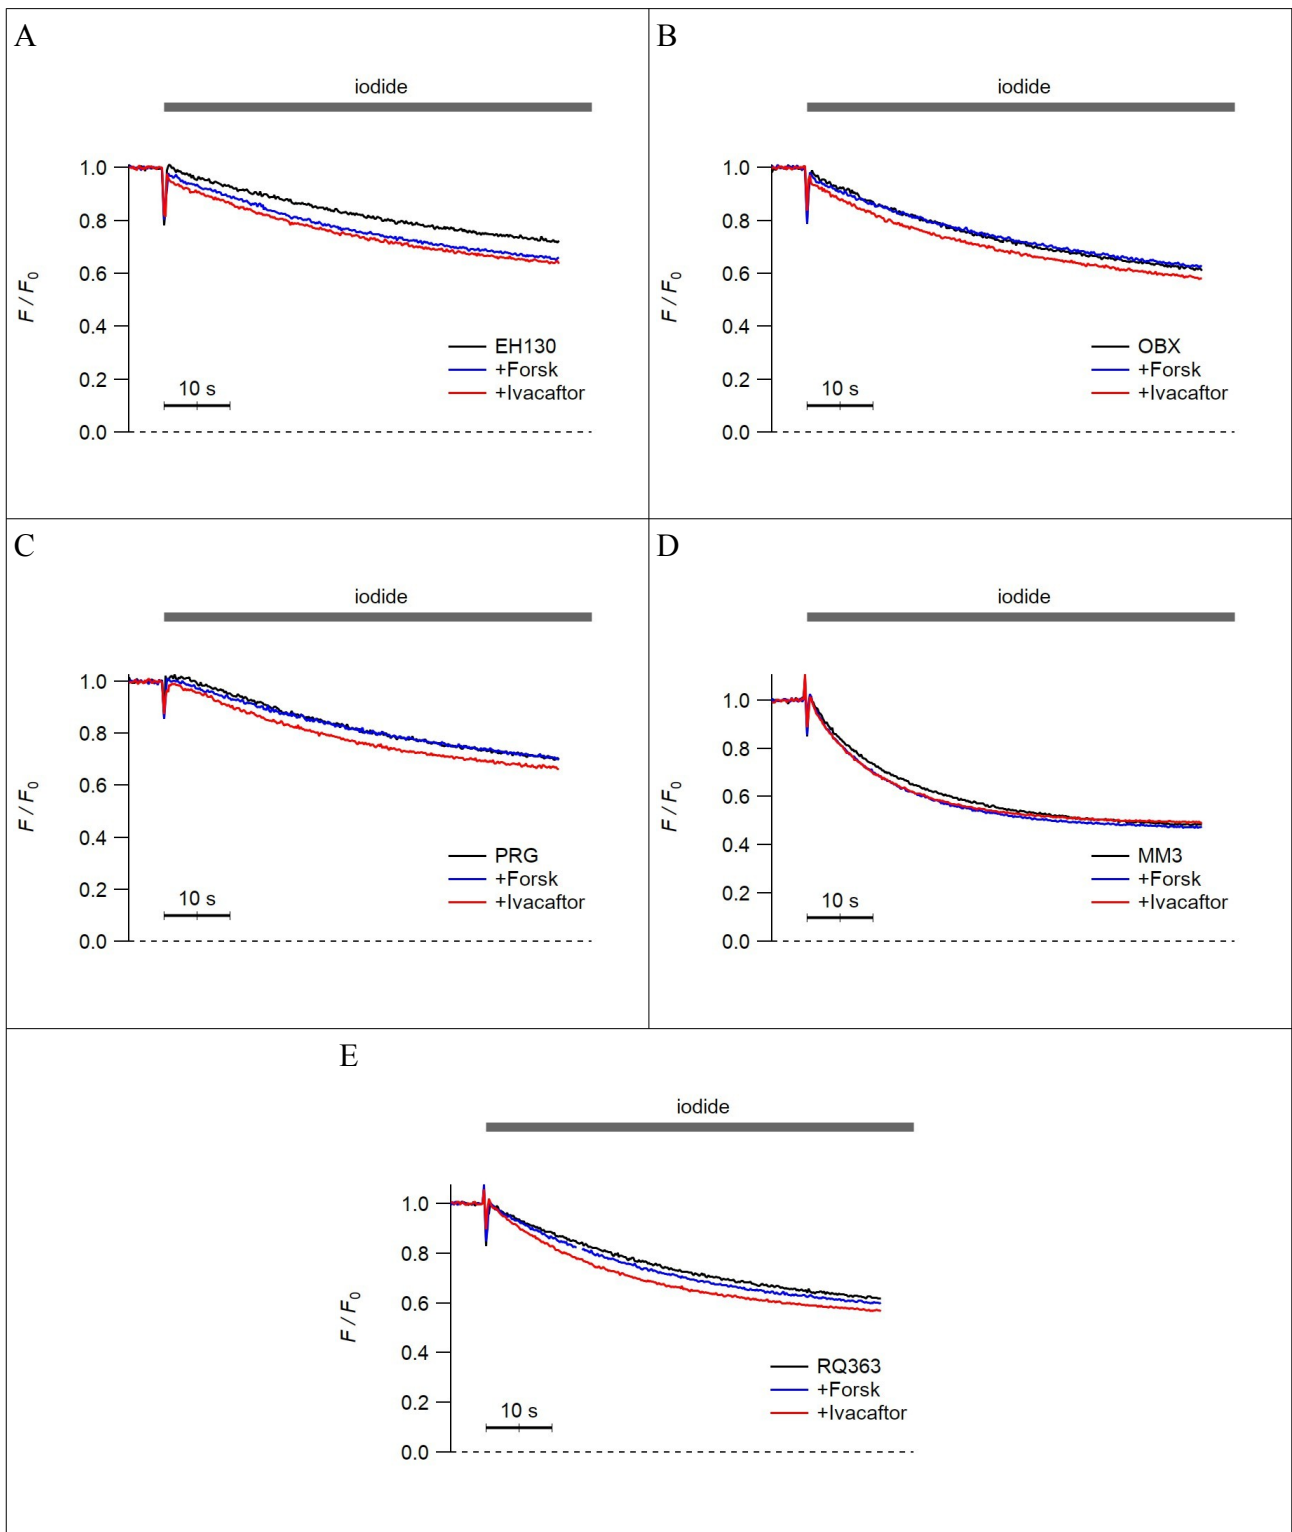

**Figure S18.** Anionophore-driven iodide transport in cells transfected with F508del CFTR. Figure indicate the time course of the fluorescence decay in mutant-CFTR transfected FRT cells incubated with 2  $\mu\text{M}$  of anionophores. Iodide transport was measured after incubation with anionophore (black trace), anionophore plus forskolin that activates the mutant-CFTR (blue trace) and in cells pre-treated with the corrector lumacaftor for 24 hours, and incubated with anionophore and forskolin (red line).

## REFERENCES

- Altomare A, Burla MC, Camalli M, et al (1999) SIR97: a new tool for crystal structure determination and refinement. *J Appl Crystallogr* 32:115–119. doi: 10.1107/S0021889898007717
- Farrugia LJ (1999) WinGX suite for small-molecule single-crystal crystallography. *J Appl Crystallogr* 32:837–838. doi: 10.1107/S0021889899006020
- Hübschle CB, Sheldrick GM, Dittrich B (2011) ShelXle: a Qt graphical user interface for SHELXL. *J Appl Crystallogr* 44:1281–1284. doi: 10.1107/S0021889811043202
- Kancharla P, Reynolds KA (2013) Synthesis of 2,2'-bipyrrole-5-carboxaldehydes and their application in the synthesis of B-ring functionalized prodiginines and tambjamines. *Tetrahedron* 69:8375–8385. doi: 10.1016/j.tet.2013.07.067
